# Supplementary material for: Inhibition of the 60S ribosome biogenesis GTPase LSG1 causes endoplasmic reticular disruption and cellular senescence
Source: PubMed Central journal article supplement (PMC6612703; doi:10.1111/acel.12981), 2019-05-31

**a.**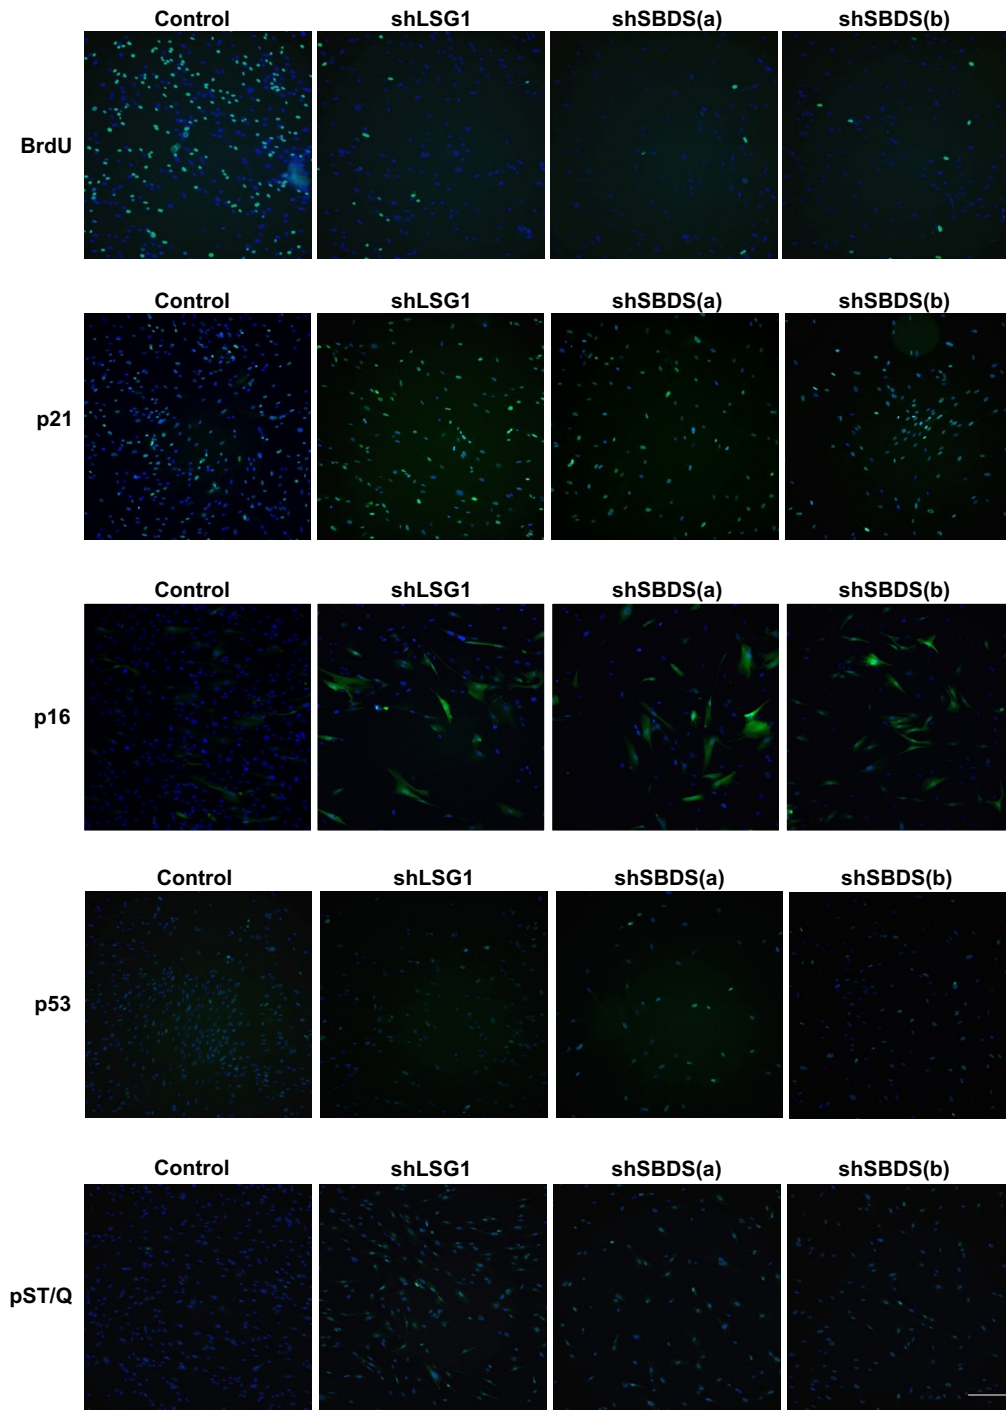**b.**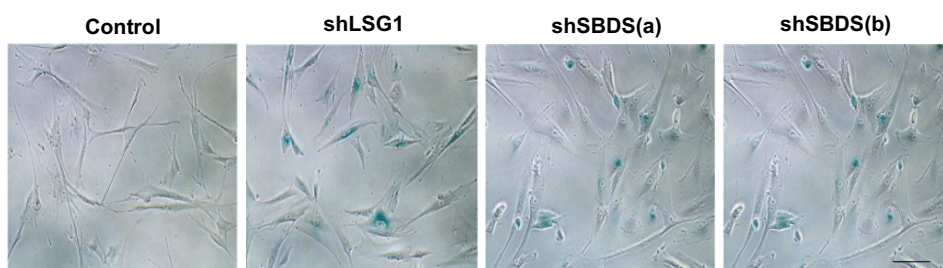

a.

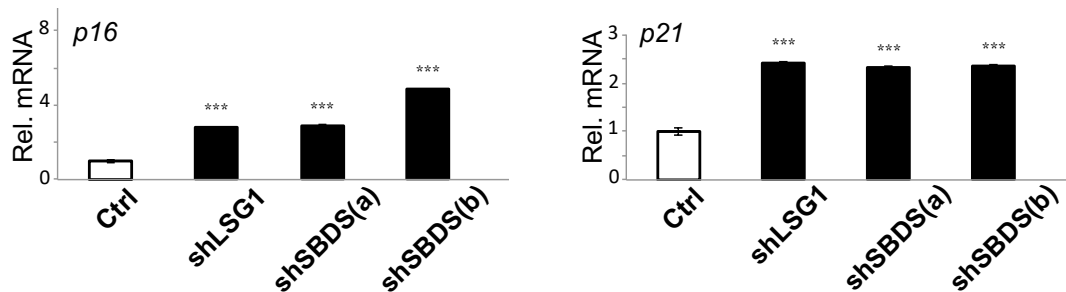

b.

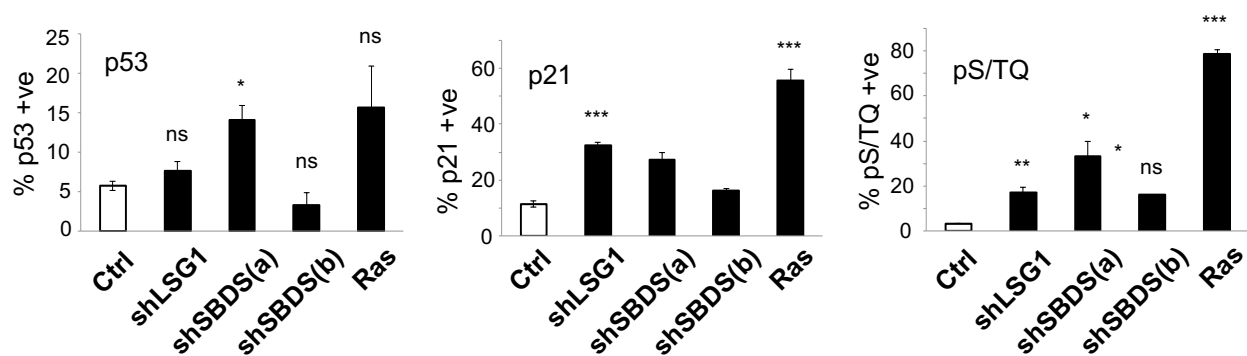

c.

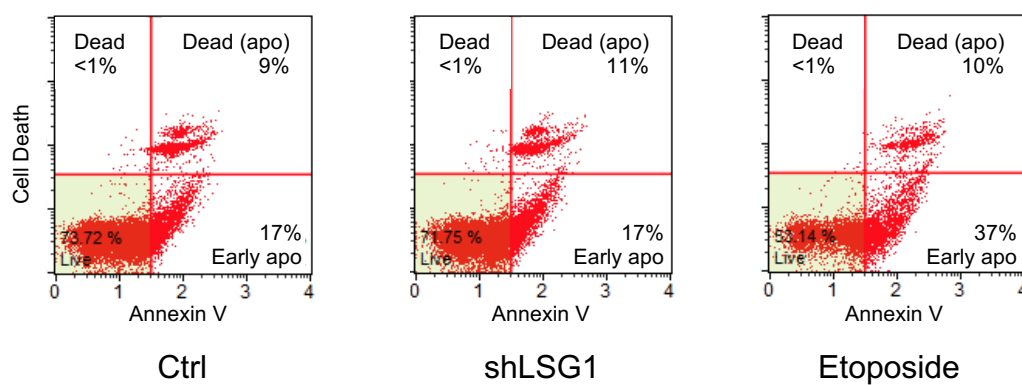

d.

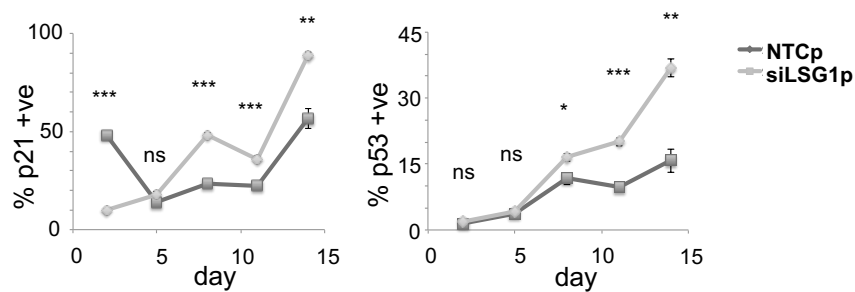

**a.**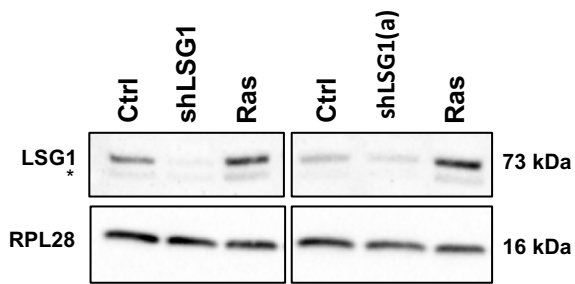**b.**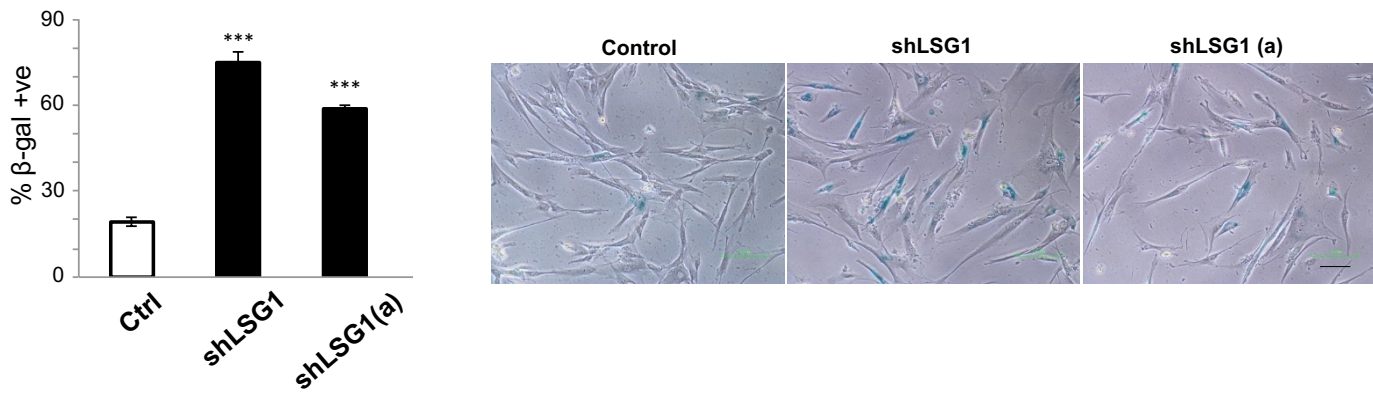**c.**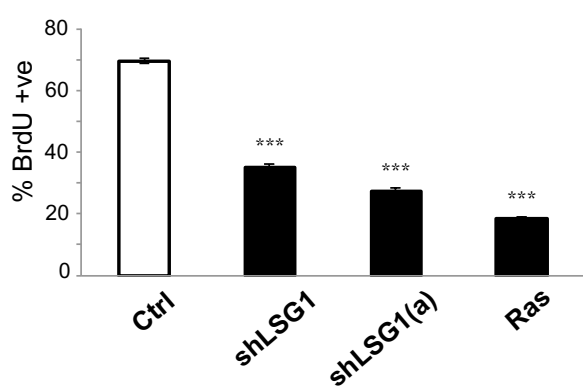

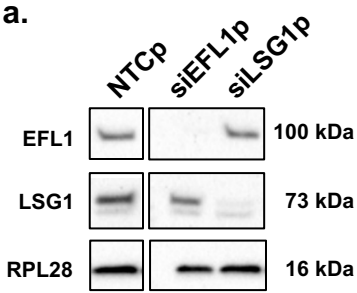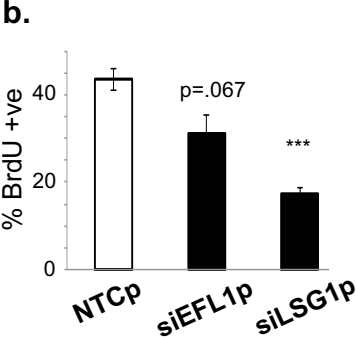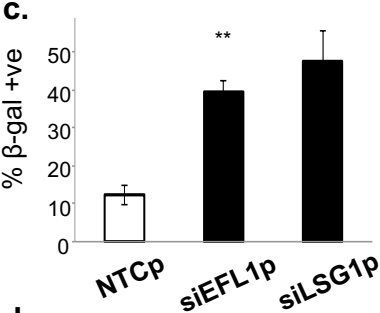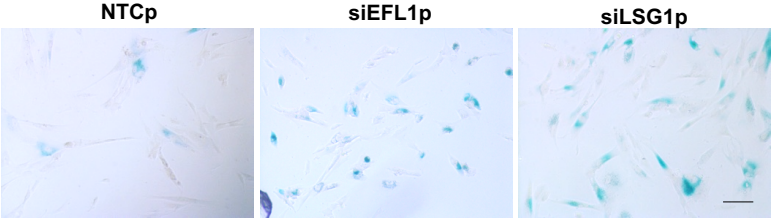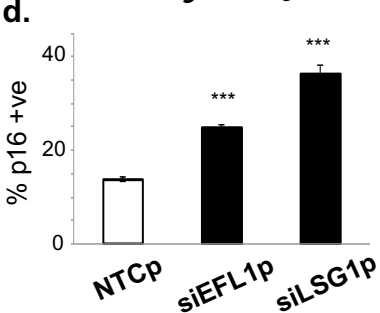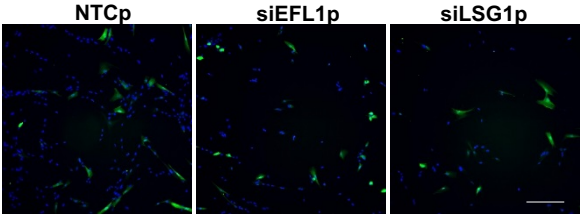

**a.**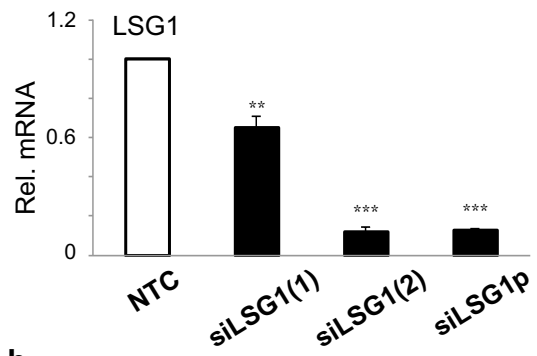**b.**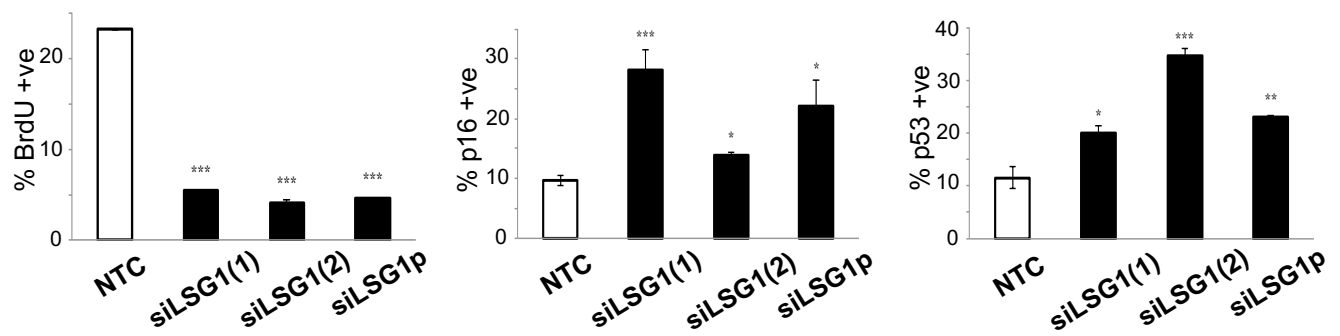

a.

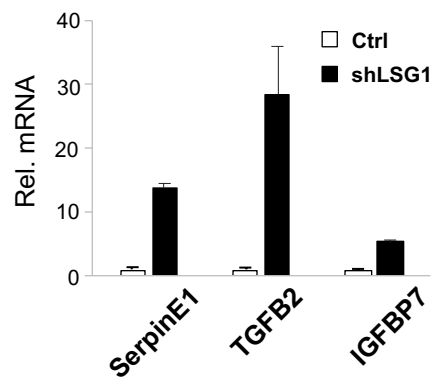

b.

## List of cholesterol biosynthesis-related genes enriched in shLSG1-induced senescence

| Cholesterol biosynthesis |                                                  |             |                  |
|--------------------------|--------------------------------------------------|-------------|------------------|
| Gene                     | Name                                             | Fold-change | Position in list |
| <i>MSMO1</i>             | Methylsterol monooxygenase 1                     | 14.16       | 1                |
| <i>HMGCS1</i>            | 3-Hydroxy-3-Methylglutaryl-Coenzyme A Synthase 1 | 14.13       | 3                |
| <i>CYP51A1</i>           | Cytochrome P450 Family 51 Subfamily A Member 1   | 10.41       | 4                |
| <i>ANGPTL4</i>           | Angiopoietin Like 4                              | 10.09       |                  |
| <i>TRIB1</i>             | Tribbles Pseudokinase 1                          | 9.62        | 8                |
| <i>IDI1</i>              | Isopentenyl-Diphosphate Delta Isomerase 1        | 9.34        |                  |
| <i>DHCR7</i>             | 7-Dehydrocholesterol Reductase                   | 9.27        |                  |
| <i>SQLE</i>              | Squalene Epoxidase                               | 9.08        |                  |
| <i>HMGCR</i>             | 3-Hydroxy-3-Methylglutaryl-CoA Reductase         | 8.91        |                  |
| <i>FDFT1</i>             | Farnesyl-Diphosphate Farnesyltransferase 1       | 8.89        |                  |
| <i>MVK</i>               | Mevalonate Kinase                                | 6.42        |                  |
| <i>LIPA</i>              | Lipase A                                         | 6.38        |                  |
| <i>MVD</i>               | Mevalonate Diphosphate Decarboxylase             | 6.15        |                  |
| <i>HSD17B7</i>           | Hydroxysteroid (17-beta) dehydrogenase 7         | 3.52        |                  |
| <i>NSDHL</i>             | NAD(P) Dependent Steroid Dehydrogenase-Like      | 3.31        |                  |

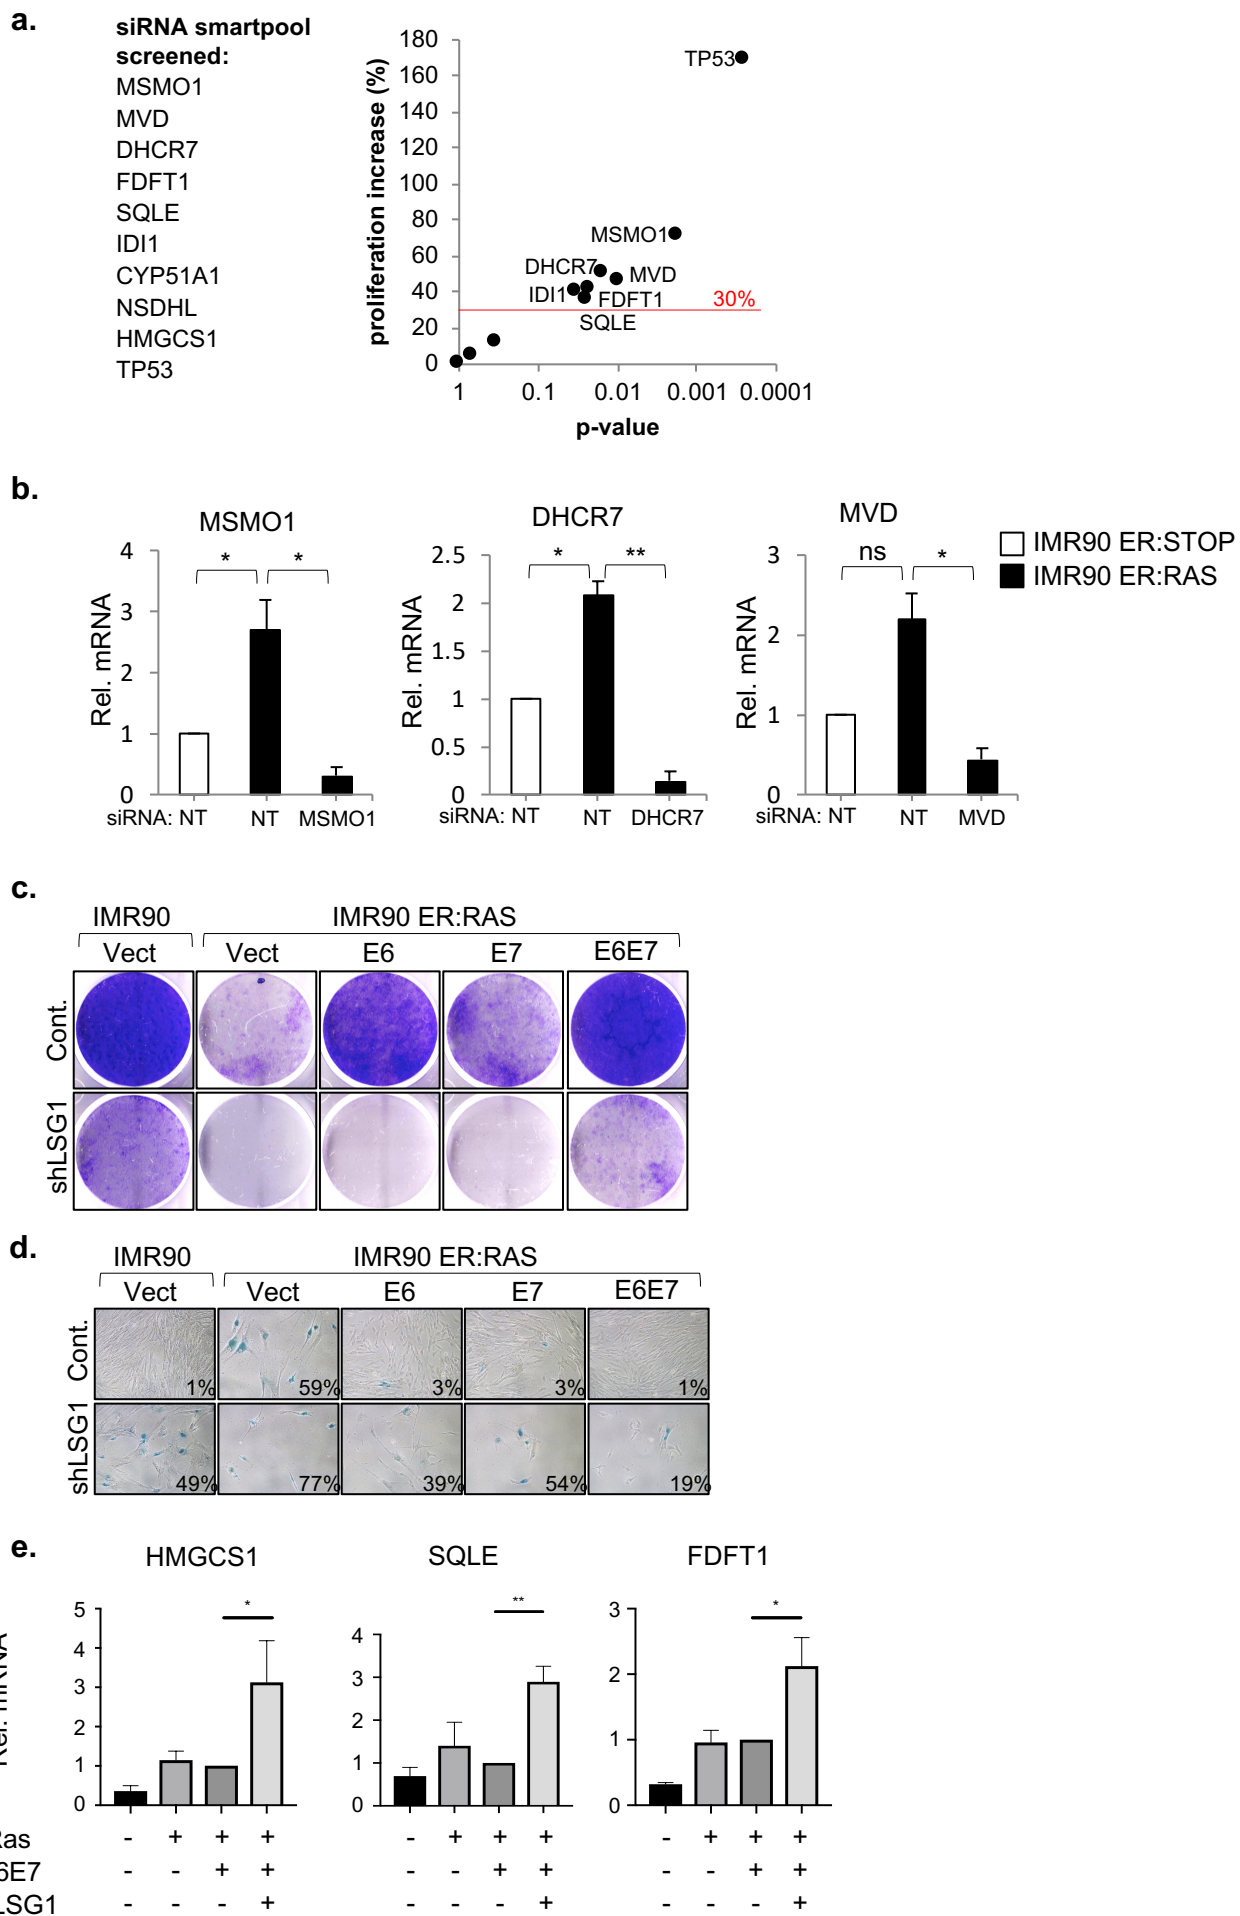

Supplement: ACEL-18-e12981-s001.pdf [file ACEL-18-e12981-s001.pdf]
